# Supplementary material
Source: PubMed Central journal article supplement (PMC4852207)
Supplement: ijbsv12p0607s1.pdf [file ijbsv12p0607s1.pdf]

## Supplementary Material

**Figure S1** Phylogenetic tree of *NIFOXO* and its homologues.

*Aa*, *Aedes aegypti*, ABK76646.1; *Ad*, *Apis dorsata*, XP\_006623461.1; *Af*, *Apis florea*, XP\_003692941.1; *Amel*, *Apis mellifera*, XP\_001122804.2; *Amex*, *Astyanax mexicanus*, XP\_007258711.1; *Ap*, *Acyrtosiphon pisum*, XP\_001944722.2; *Bg*, *Blattella germanica*, CCF23214.1; *Bi*, *Bombus impatiens*, XP\_003487689.1; *Bm*, *Bombyx mori*, AFD99125.1; *Bt*, *Bos Taurus*, NP\_001193012.1; *Ca*, *Chrysochloris asiatica*, XP\_006873780.1; *Cca*, *Ceratitidis capitata*, XP\_004531037.1; *Ccr*, *Condylura cristata*, XP\_004680393.1; *Ce*, *Caenorhabditis elegans*, O16850.3; *Cg*, *Crassostrea gigas*, EKC23646.1; *Ch*, *Clytia hemisphaerica*, ABG21226.1; *Ci*, *Ciona intestinalis*, NP\_001071717.1; *Clf*, *Canis lupus familiaris*, XP\_003639448.1; *Cp*, *Culex pipiens*, AEI86721.1; *Css*, *Ceratotherium simum*, XP\_004443237.1; *Dm*, *Drosophila melanogaster*, NP\_996205.1; *Dr*, *Danio rerio*, NP\_571160.1; *Ee*, *Elephantulus edwardii*, XP\_006879673.1; *Gg*, *Gallus gallus*, XP\_001234496.2; *Gmm*, *Glossina morsitans morsitans*, AFQ01085.1; *Hg*, *Heterocephalus glaber*, XP\_004889213.1; *Hsal*, *Harpegnathos saltator*, EFN84381.1; *Hsap*, *Homo sapiens*, NP\_001446.1; *Lc*, *Latimeria chalumnae*, XP\_005993189.1; *Mb*, *Myotis brandtii*, XP\_005862824.1; *Md*, *Musca domestica*, XP\_005190128.1; *Mmul*, *Macaca mulatta*, XP\_001093593.1; *Mmus*, *Mus musculus*, NP\_062714.1; *Mo*, *Metaseiulus occidentalis*, XP\_003741272.1; *Mr*, *Megachile rotundata*, XP\_003705281.1; *Nl*, *Nilaparvata lugens*, KM250122; *Nv*, *Nasonia vitripennis*, XP\_001607658.2; *Pa*, *Pteropus alecto*, XP\_006909082.1; *Pmb*, *Peromyscus maniculatus bairdii*, XM\_006977605.1; *Pt*, *Pan troglodytes*, XP\_003311562.1; *Rn*, *Rattus norvegicus*, NP\_001099865.1; *Sh*, *Sarcophilus harrisi*, XP\_003769392.1; *Sk*, *Saccoglossus kowalevskii*, NP\_001158440.1; *Sm*, *Schistosoma mansoni*, ABG78546.1; *Sp*, *Strongylocentrotus purpuratus*, ABB89484.1; *Ss*, *Sus scrofa*, NP\_999179.2; *Tca*, *Tribolium castaneum*, XP\_975200.1; *Tch*, *Tupaia chinensis*, XP\_006154300.1; *Tml*, *Trichechus manatus latirostris*, XP\_004388138.1; *Ts*, *Trichinella spiralis*, XP\_003372811.1; *Tt*, *Tursiops truncatus*, XP\_004315811.1; *Xl*, *Xenopus laevis*, ACO24747.1; *Xm*, *Xiphophorus maculatus*, AAK74186.1.

**Figure S2** Phylogenetic tree of *NIAkt* and its homologues.

*Am*, *Alligator mississippiensis*, XM\_006257899.1; *As*, *Alligator sinensis*, XM\_006031384.1; *Ag*, *Anopheles gambiae*, XM\_003435996; *Bas*, *Balaenoptera acutorostrata scammoni*, XM\_007176250.1; *Bm*, *Bos mutus*, XM\_005890586.1; *Bt*, *Bos Taurus*, XM\_005218981.1; *Bb*, *Bubalus bubalis*, XM\_006050047.1; *Cf*, *Camelus ferus*, XM\_006177926.1; *Clf*, *Canis lupus familiaris*, XM\_005623876.1; *Ch*, *Capra hircus*, XM\_005692409.1; *Cl*, *Chinchilla lanigera*, XM\_005410843.1; *Ca*, *Chrysochloris asiatica*, XM\_006839485.1; *Cc*, *Condylura cristata*, XM\_004694120.1; *Cq*, *Culex quinquefasciatus*, XM\_001849205.1; *Dm*, *Drosophila melanogaster*, NM\_169706.2; *Ef*, *Eptesicus fuscus*, XM\_008139592.1; *Ec*, *Equus caballus*, XM\_001492713.4; *Ep*, *Equus przewalskii*, XM\_008506799.1; *Ee*, *Erinaceus europaeus*, XM\_007518365.1; *Fc*, *Felis catus*, XM\_006933187.1; *Ggg*, *Gorilla gorilla gorilla*, XM\_004055779.1; *Hl*, *Haemaphysalis longicornis*, AB601888.1; *Ha*, *Helicoverpa armigera*, N399217.1; *Hs*, *Homo sapiens*, KJ890652.1; *Lo*, *Lepisosteus oculatus*, XM\_006627598.1; *Lw*, *Leptonychotes weddellii*, XM\_006738332.1; *La*, *Loxodonta Africana*, XM\_003408651.1; *Md*, *Musca domestica*, XM\_005186450.1; *Mp*, *Mustela putorius*, XM\_004796606.1; *Mb*, *Myotis brandtii*, XM\_005868806.1; *MI*, *Myotis lucifugus*, XM\_006096753.1; *Nl*, *Nilaparvata lugens*, KM2501

21; *Nle*, *Nomascus leucogenys*, XM\_003276210.2; *Op*, *Ochotona princeps*, XM\_004584261.1; *Or*, *Odobenus rosmarus*, XM\_004395604.1; *Pp*, *Pan paniscus*, XM\_003806999.1; *Pa*, *Pteropus alecto*, XM\_006925608.1; *Sa*, *Sorex araneus*, XM\_004603607.1; *Sp*, *Stegastes partitus*, XM\_008284966.1; *Ss*, *Sus scrofa*, HQ687753.1; *Tml*, *Trichechus manatus latirostris*, XM\_004376758.1.

**Figure S3** Phylogenetic tree of *NPIP3K* and its homologues.

*Ap*, *Anas platyrhynchos*, XM\_005024480.1; *Ad*, *Apis dorsata*, XM\_006623134.1; *Af*, *Apis florea*, XM\_003697036.1; *Am*, *Astyanax mexicanus*, XM\_007228848.1; *Bt*, *Bombus terrestris*, XM\_003392868.1; *Cm*, *Callorhynchus milii*, XM\_007889678.1; *Can*, *Calypte anna*, XM\_008496003.1; *Cm*, *Chelonia mydas*, XM\_007064298.1; *Cla*, *Chinchilla lanigera*, XM\_005406860.1; *Cpb*, *Chrysemys picta belli*, XM\_005278661.2; *Cas*, *Chrysochloris asiatica*, XM\_006846635.1; *Cli*, *Columba livia*, XM\_005505585.1; *Cb*, *Corvus brachyrhynchos*, XM\_008633983.1; *Dm*, *Drosophila melanogaster*, NM\_057785.5; *Et*, *Echinops telfairi*, XM\_004704007.1; *Ef*, *Eptesicus fuscus*, XM\_008153234.1; *Ec*, *Equus caballus*, XM\_001496778.2; *Fc*, *Falco cherrug*, XM\_005445871.1; *Fp*, *Falco peregrinus*, XM\_005242248.1; *Fa*, *Ficedula albicollis*, XM\_005041237.1; *Gg*, *Gallus gallus*, XM\_001235240.2; *Gf*, *Geospiza fortis*, XM\_005423953.1; *Hs*, *Homo sapiens*, NM\_014602.2; *Lo*, *Lepisosteus oculatus*, XM\_006635531.1; *Lv*, *Lipotes vexillifer*, XM\_007462423.1; *La*, *Loxodonta Africana*, XM\_003420917.1; *Mr*, *Megachile rotundata*, XM\_003703820.1; *Mg*, *Meleagris gallopavo*, XM\_003207226.1; *Mu*, *Melopsittacus undulates*, XM\_005141305.1; *Mde*, *Microplitis demolitor*, XM\_008547450.1; *Mdo*, *Monodelphis domestica*, XM\_003342097.2; *Mb*, *Myotis brandtii*, XM\_005863585.1; *Mda*, *Myotis davidii*, XM\_006770215.1; *Ml*, *Myotis lucifugus*, XM\_006083684.1; *Nl*, *Nilaparvata lugens*, KM373311; *Nv*, *Nasonia vitripennis*, XM\_008204184.1; *Op*, *Ochotona princeps*, XM\_004588388.1; *Oaa*, *Orycteropus afer*, XM\_007936842.1; *Og*, *Otolemur garnettii*, XM\_003781713.1; *Pt*, *Pan troglodytes*, XM\_516746.3; *Phc*, *Pediculus humanus corporis*, XM\_002429885.1; *Pc*, *Physeter catodon*, XM\_007115466.1; *Pr*, *Poecilia reticulata*, XM\_008430629.1; *Ph*, *Pseudopodoces humilis*, XM\_005518997.1; *Pb*, *Python bivittatus*, XM\_007433030.1; *St*, *Spermophilus tridecemlineatus*, XM\_005327000.1; *Sp*, *Stegastes partitus*, XM\_008297967.1; *Tg*, *Taeniopygia guttata*, XM\_002198545.1; *Tc*, *Tribolium castaneum*, XM\_965590.2; *Tm*, *Trichechus manatus*, XM\_004381391.1; *Za*, *Zonotrichia albicollis*, XM\_005480995.1.

**Figure S4** Phylogenetic tree of *NIPDK* and its homologues.

*Ap*, *Acyrtosiphon pisum*, XM\_001950984.3; *Ad*, *Apis dorsata*, XM\_006608687.1; *Af*, *Apis florea*, XM\_003697518.1; *Am*, *Apis mellifera*, XM\_006567943.1; *At*, *Arabidopsis thaliana*, AF132742.1; *Bi*, *Bombus impatiens*, XM\_003487039.1; *Bt*, *Bombus terrestris*, XM\_003396474.1; *Dm*, *Drosophila melanogaster*, NM\_080382.4; *Hl*, *Haemaphysalis longicornis*, AB617886.1; *Hb*, *Haplochromis burtoni*, XM\_005939509.1; *Hs*, *Homo sapiens*, AF017995.1; *Le*, *Lycopersicon esculentum*, AY849915.1; *Mz*, *Maylandia zebra*, XM\_004562456.1; *Mr*, *Megachile rotundata*, XM\_003708447.1; *Md*, *Microplitis demolitor*, XM\_008560785.1; *Nb*, *Neolamprologus brichardi*, XM\_006801043.1; *Nl*, *Nilaparvata lugens*, KM373312; *Nv*, *Nasonia vitripennis*, XM\_008204995.1; *On*, *Oreochromis niloticus*, XM\_003438771.2; *Oa*, *Orycteropus afer*, XM\_007939543.1; *Ol*, *Oryzias latipes*, XM\_004080354.1; *Pf*, *Poecilia Formosa*, XM\_007576622.1; *Pr*, *Poecilia reticulata*, XM\_008436325.1; *Pb*, *Python bivittatus*, XM\_007439249.1; *Sp*, *Stegastes partitus*, XM\_008303696.1; *Tr*, *Takifugu rubripes*, XM\_003961305.1; *Xm*, *Xiphophorus maculatus*, XM\_005803239.1.

Figure S5 QRT-PCR measurement of the expression of *NIP13K*, *NIakt*, *NIPDK1* and *NIFOXO* after dsRNA knockdown /double knockdown of *PI3K/Akt/FOXO* Signaling.

Figure S1

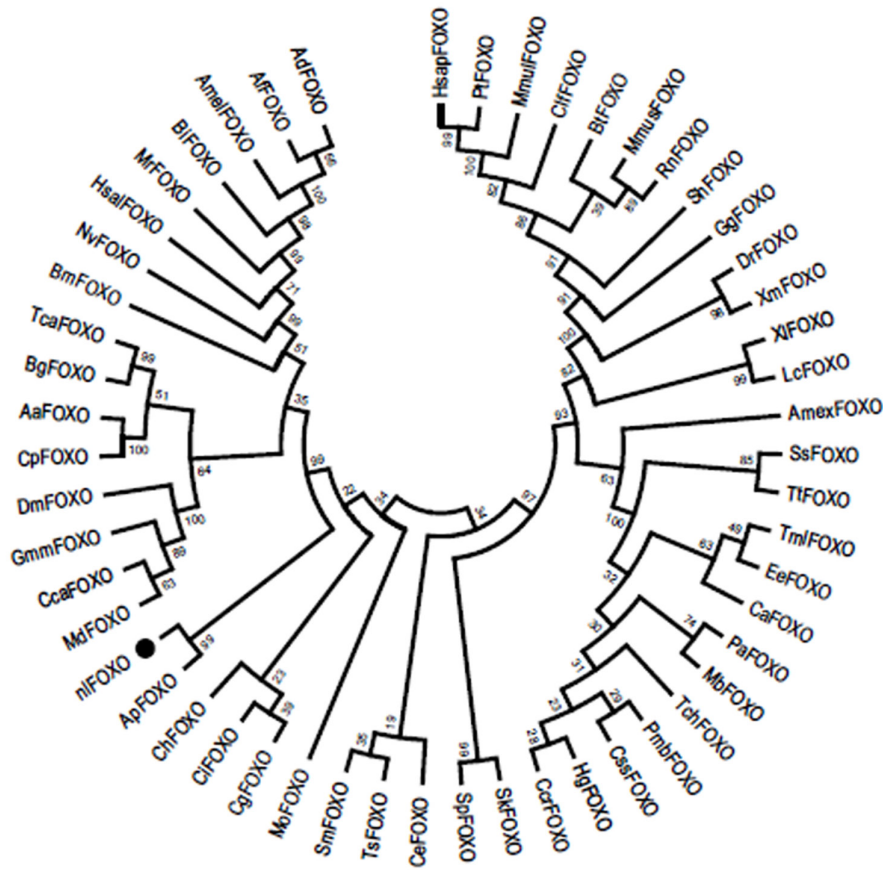

Figure S2

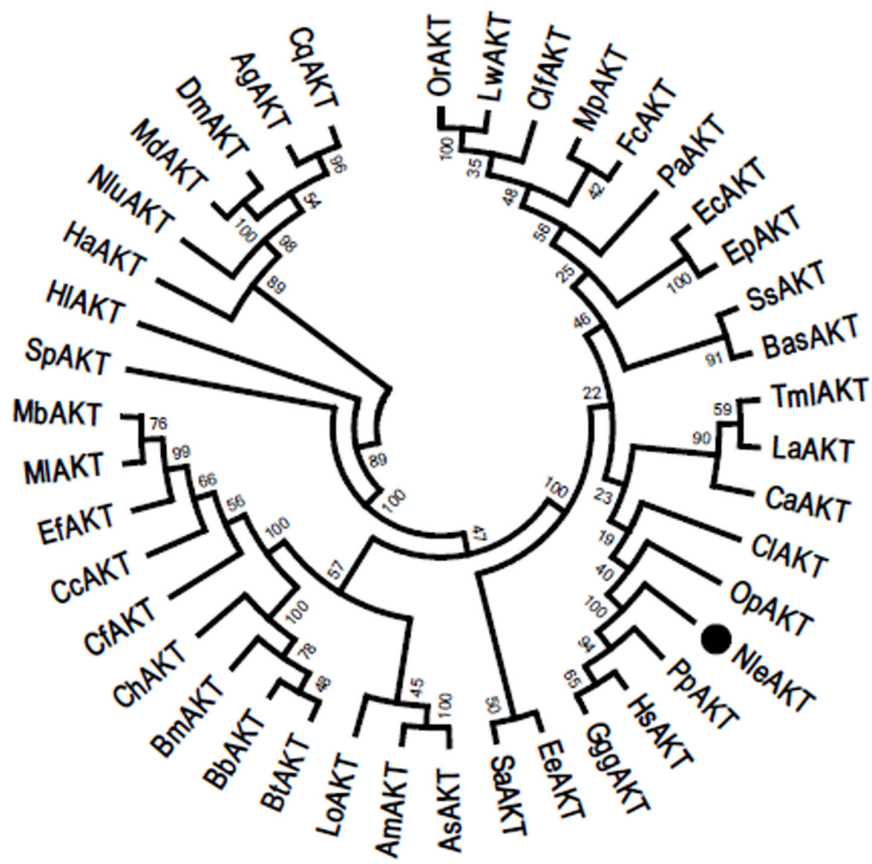

Figure S3

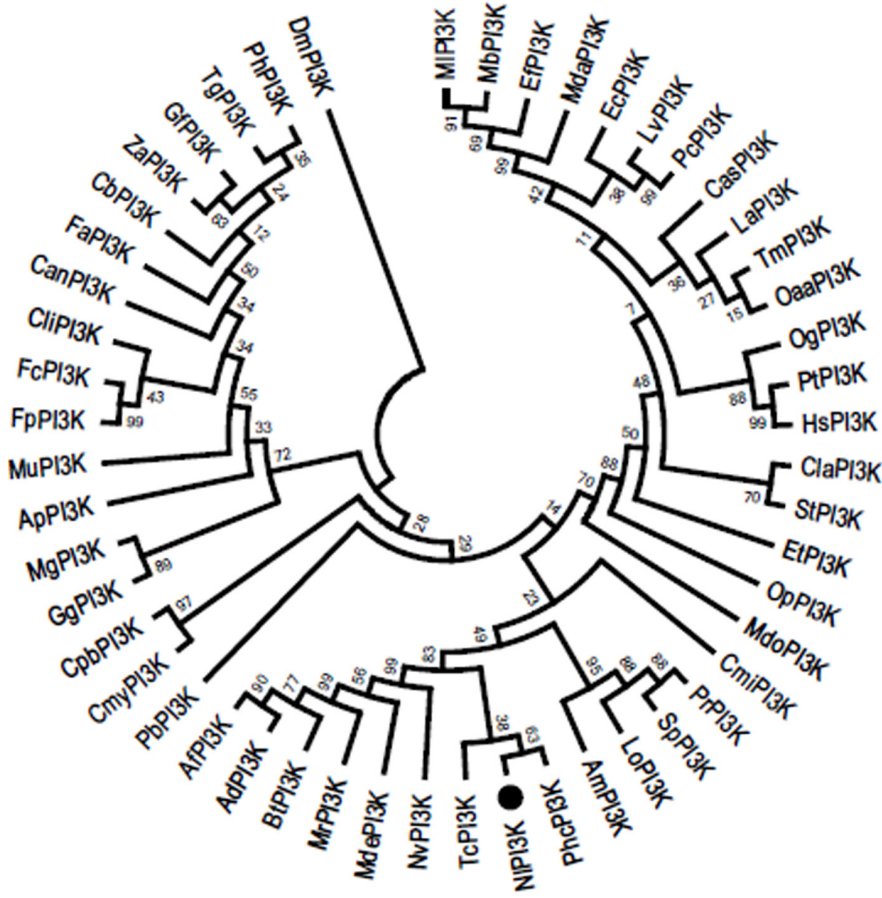

Figure S4

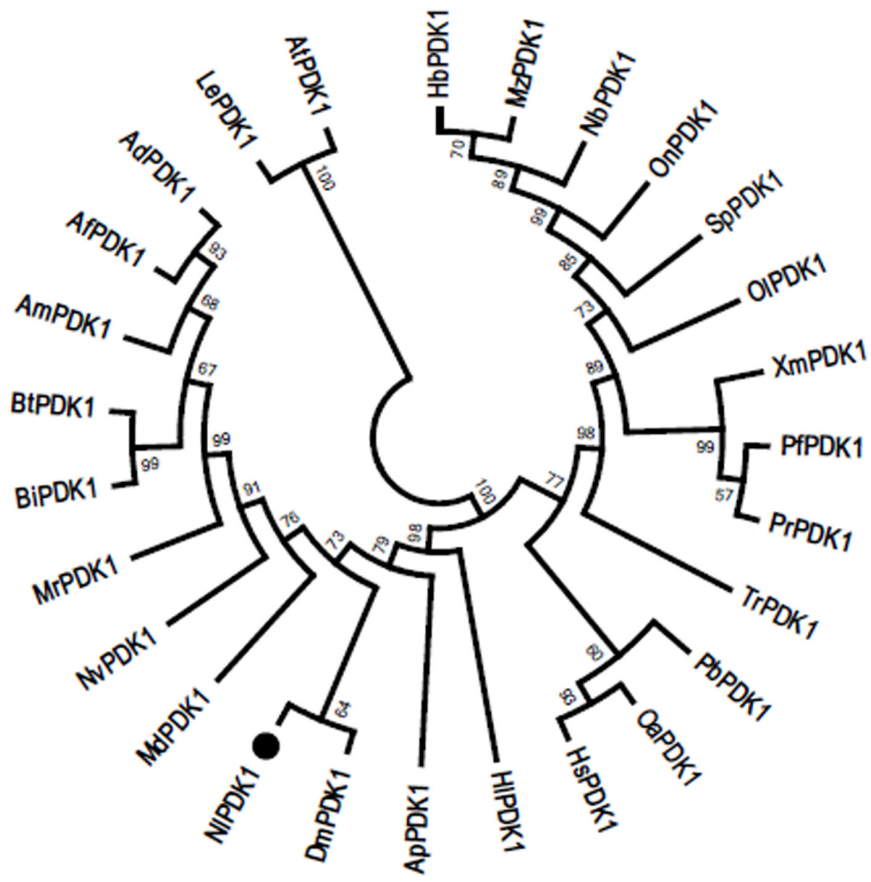

Figure S5

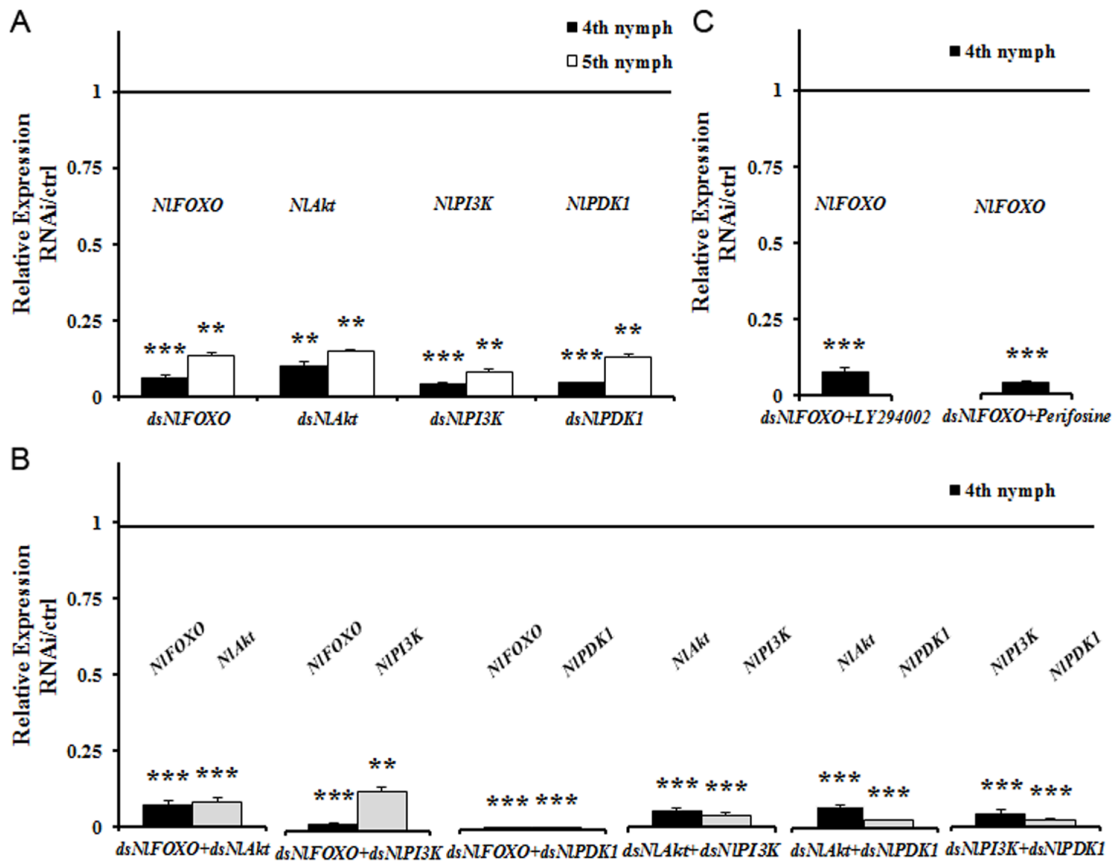

**Table S1** Parameters measured and calculated for cluster analysis.

| Catatory          | Treatment           | Body length<br>(10 <sup>-3</sup> m) | Body<br>weight(10 <sup>-3</sup> g) | Bristle number/wing<br>area(bristle/10 <sup>-6</sup> m <sup>2</sup> ) |        |
|-------------------|---------------------|-------------------------------------|------------------------------------|-----------------------------------------------------------------------|--------|
| <b>SWF</b>        | NC                  | 3.25                                | 2.45                               | 144.20                                                                |        |
|                   | dsGFP               | 3.41                                | 1.80                               | 157.78                                                                |        |
|                   | dsNIAkt             | 3.16                                | 1.44                               | 160.62                                                                |        |
|                   | dsNIPI3K            | 3.22                                | 2.41                               | 185.46                                                                |        |
|                   | dsNIPDK1            | 3.18                                | 1.70                               | 196.99                                                                |        |
|                   | LY294002            | 3.41                                | 2.14                               | 137.81                                                                |        |
|                   | Perifosine(SWF)     | 3.36                                | 1.76                               | 172.09                                                                |        |
|                   | dsNIFOXO+dsNIAkt    | 3.29                                | 1.76                               | 150.01                                                                |        |
|                   | dsNIFOXO+dsNIPI3K   | 3.06                                | 2.09                               | 193.79                                                                |        |
|                   | dsNIAkt+dsNIPI3K    | 3.12                                | 2.03                               | 180.16                                                                |        |
|                   | dsNIAkt+dsNIPDK1    | 3.19                                | 1.79                               | 196.01                                                                |        |
|                   | dsNIPI3K+dsNIPDK1   | 3.14                                | 1.73                               | 160.86                                                                |        |
|                   | <b>SWM</b>          | NC                                  | 2.87                               | 1.01                                                                  | 202.80 |
|                   |                     | dsGFP                               | 2.50                               | 0.93                                                                  | 216.28 |
| dsNIAkt           |                     | 2.37                                | 0.75                               | 243.33                                                                |        |
| dsNIPI3K          |                     | 2.78                                | 1.36                               | 209.15                                                                |        |
| dsNIPDK1          |                     | 2.39                                | 0.73                               | 246.97                                                                |        |
| LY294002          |                     | 2.50                                | 1.02                               | 211.02                                                                |        |
| Perifosine        |                     | 2.41                                | 1.06                               | 159.80                                                                |        |
| dsNIFOXO+dsNIAkt  |                     | 2.60                                | 1.20                               | 234.37                                                                |        |
| dsNIAkt+dsNIPI3K  |                     | 2.53                                | 1.10                               | 199.94                                                                |        |
| dsNIAkt+dsNIPDK1  |                     | 2.47                                | 0.92                               | 236.72                                                                |        |
| dsNIPI3K+dsNIPDK1 |                     | 2.41                                | 0.93                               | 214.00                                                                |        |
| <b>LWF</b>        |                     | NC                                  | 3.42                               | 2.27                                                                  | 69.78  |
|                   |                     | dsGFP                               | 3.47                               | 2.17                                                                  | 67.20  |
|                   |                     | dsNIFOXO                            | 3.55                               | 2.07                                                                  | 75.77  |
|                   | dsNIPDK1            | 3.07                                | 1.63                               | 79.03                                                                 |        |
|                   | LY294002            | 3.50                                | 2.70                               | 64.76                                                                 |        |
|                   | Perifosine          | 3.38                                | 2.40                               | 76.73                                                                 |        |
|                   | dsNIFOXO+dsNIAkt    | 3.31                                | 1.78                               | 90.73                                                                 |        |
|                   | dsNIFOXO+dsNIPI3K   | 3.42                                | 2.24                               | 99.36                                                                 |        |
|                   | dsNIFOXO+dsNIPDK1   | 3.34                                | 2.02                               | 93.87                                                                 |        |
|                   | dsNIFOXO+LY294002   | 3.19                                | 2.08                               | 79.38                                                                 |        |
|                   | dsNIFOXO+Perifosine | 3.16                                | 1.82                               | 98.98                                                                 |        |
|                   | <b>LWM</b>          | NC                                  | 2.99                               | 1.11                                                                  | 78.06  |
|                   |                     | dsGFP                               | 2.53                               | 1.10                                                                  | 78.44  |
|                   |                     | dsNIFOXO                            | 2.54                               | 1.02                                                                  | 102.74 |
| dsNIAkt           |                     | 2.41                                | 1.42                               | 102.25                                                                |        |
| dsNIPI3K          |                     | 2.70                                | 1.08                               | 89.00                                                                 |        |
| dsNIPDK1          |                     | 2.50                                | 1.07                               | 81.64                                                                 |        |
| LY294002          | 2.56                | 1.17                                | 71.71                              |                                                                       |        |



---

|                     |      |      |        |
|---------------------|------|------|--------|
| Perifosine          | 2.77 | 1.57 | 77.07  |
| dsNIFOXO+dsNIAkt    | 2.52 | 0.93 | 90.49  |
| dsNIFOXO+dsNIP13K   | 2.59 | 1.13 | 91.09  |
| dsNIFOXO+dsNIPDK1   | 2.54 | 1.40 | 78.44  |
| dsNIAkt+dsNIP13K    | 2.47 | 1.17 | 101.56 |
| dsNIAkt+dsNIPDK1    | 2.47 | 0.95 | 84.68  |
| dsNIP13K+dsNIPDK1   | 2.39 | 0.98 | 78.60  |
| dsNIFOXO+LY294002   | 2.63 | 1.06 | 76.12  |
| dsNIFOXO+Perifosine | 2.53 | 0.99 | 84.32  |

---
